# Supplementary material for: Neighbourhood environment factors and the occurrence of injuries in Canadian adolescents: a validation study and exploration of structural confounding
Source: HighWire-hosted journal article supplement (doi:10.1136/bmjopen-2014-004919), 2014-07-01
Supplement: bmjopen-2014-004919supp.pdf [file bmjopen-2014-004919supp.pdf]

## Appendix Table 1

### Comparison between respondents and non-respondents

|                                                                                                                | Answered Social Capital questions | Did not answer Social Capital questions |
|----------------------------------------------------------------------------------------------------------------|-----------------------------------|-----------------------------------------|
| n of student                                                                                                   | 23,532                            | 2,546                                   |
| Age (mean, SD)                                                                                                 | 14.2 (1.5)                        | 14.1 (1.58)                             |
| % male                                                                                                         | 48.17                             | 61.21                                   |
| Number of injured (%)                                                                                          | 3,425 (14.6)                      | 274 (14.1)                              |
| Family affluence                                                                                               |                                   |                                         |
| Well off                                                                                                       | 13,466 (55)                       | 845 (52.5)                              |
| Average                                                                                                        | 8,581 (35.1)                      | 580 (36)                                |
| Not well off                                                                                                   | 2,414 (9.9)                       | 186 (11.5)                              |
| No significant differences between respondents and non-respondents after performing t-test or Chi-square tests |                                   |                                         |
